# Supplementary material
Source: PubMed Central journal article supplement (PMC2916996)
Supplement: tjp0588-2669-SD1.pdf [file tjp0588-2669-SD1.pdf]

## SUPPLEMENTAL MATERIAL

**Online Supplemental Table 1. Haemodynamics at Baseline and During Complete Autonomic Blockade for Subjects Grouped According to Homozygous Arg16 vs. Gly16**

| Measure            | Condition | Position 16 group |              | <i>P</i> <sub>ANOVA</sub> |
|--------------------|-----------|-------------------|--------------|---------------------------|
|                    |           | Arg16 (n=13)      | Gly16 (n=27) |                           |
| <b>HR (bpm)</b>    | Baseline  | 66 ± 2            | 60 ± 2       | 0.04                      |
|                    | Trimeth.* | 87 ± 3            | 82 ± 2       | ns                        |
| <b>CO (L/min)</b>  | Baseline  | 5.6 ± 0.5         | 6.4 ± 0.4    | ns                        |
|                    | Trimeth.  | 5.6 ± 0.4         | 6.1 ± 0.4    | ns                        |
| <b>MAP (mmHg)</b>  | Baseline  | 89 ± 2            | 87 ± 1       | ns                        |
|                    | Trimeth.* | 74 ± 3            | 72 ± 1       | ns                        |
| <b>SVR (units)</b> | Baseline  | 19.0 ± 3.0        | 14.8 ± 0.8   | 0.09                      |
|                    | Trimeth.* | 13.6 ± 0.8        | 12.4 ± 0.7   | ns                        |
| <b>SV (mL)</b>     | Baseline  | 86 ± 10           | 107 ± 7      | 0.08                      |
|                    | Trimeth.* | 66 ± 6            | 77 ± 5       | ns                        |

Values are mean ± SEM. HR, heart rate; CO, cardiac output; MAP, mean arterial pressure; SVR, systemic vascular resistance with units = MAP/CO; SV, stroke volume. Trimeth.\* indicates a significant effect of trimethaphan on all values for all groups (*P* < 0.01). *P*<sub>ANOVA</sub> indicates comparisons across groups in the time-specific condition.

**Online Supplemental Table 2. Haemodynamics Immediately Before and During Terbutaline Infusions by Position 16**

|                                       |                                                    | Position 16 Group    |              | $P_{ANOVA}$ |
|---------------------------------------|----------------------------------------------------|----------------------|--------------|-------------|
|                                       |                                                    | Arg16 (n=13)         | Gly16 (n=27) |             |
| <b>Heart Rate<br/>(bpm)</b>           | BL <sub>Trimeth + PE</sub>                         | 86 ± 2               | 78 ± 2       | 0.005       |
|                                       | Terb 33                                            | 101 ± 2              | 91 ± 2       | 0.007       |
|                                       | Terb 67                                            | 117 ± 3              | 106 ± 2      | 0.01        |
|                                       | $P_{genotype} / P_{dose} / P_{interaction}$        | < 0.01, < 0.01, 0.28 |              |             |
|                                       | $\Delta P_{genotype} / P_{dose} / P_{interaction}$ | 0.15, < 0.01, 0.18   |              |             |
| <b>Cardiac<br/>Output<br/>(L/min)</b> | BL <sub>Trimeth + PE</sub>                         | 6.7 ± 0.6            | 6.8 ± 0.4    | ns          |
|                                       | Terb 33                                            | 7.4 ± 0.6            | 8.0 ± 0.5    | ns          |
|                                       | Terb 67                                            | 8.0 ± 0.6            | 9.3 ± 0.6    | ns          |
|                                       | $P_{genotype} / P_{dose} / P_{interaction}$        | 0.41, < 0.01, 0.11   |              |             |
|                                       | $\Delta P_{genotype} / P_{dose} / P_{interaction}$ | 0.1, < 0.01, 0.06    |              |             |
| <b>MAP<br/>(mmHg)</b>                 | BL <sub>Trimeth + PE</sub>                         | 95 ± 3               | 94 ± 2       | ns          |
|                                       | Terb 33                                            | 82 ± 4               | 77 ± 2       | ns          |
|                                       | Terb 67                                            | 68 ± 3               | 66 ± 2       | ns          |
|                                       | $P_{genotype} / P_{dose} / P_{interaction}$        | 0.38, < 0.01, 0.33   |              |             |
|                                       | $\Delta P_{genotype} / P_{dose} / P_{interaction}$ | 0.36, < 0.01, 0.36   |              |             |
| <b>SVR (units)</b>                    | BL <sub>Trimeth + PE</sub>                         | 15.1 ± 0.9           | 14.8 ± 0.7   | ns          |
|                                       | Terb 33                                            | 11.8 ± 0.8           | 10.6 ± 0.8   | ns          |
|                                       | Terb 67                                            | 8.9 ± 0.7            | 7.5 ± 0.3    | 0.03        |
|                                       | $P_{genotype} / P_{dose} / P_{interaction}$        | 0.34, < 0.01, 0.56   |              |             |
|                                       | $\Delta P_{genotype} / P_{dose} / P_{interaction}$ | 0.15, < 0.01, 0.40   |              |             |

|                                                                                                    |                            |                  |        |      |
|----------------------------------------------------------------------------------------------------|----------------------------|------------------|--------|------|
| <b>Stroke</b>                                                                                      | BL <sub>Trimeth + PE</sub> | 78 ± 7           | 88 ± 5 | ns   |
| <b>Volume</b>                                                                                      | Terb 33                    | 75 ± 7           | 90 ± 7 | ns   |
| <b>(mL)</b>                                                                                        | Terb 67                    | 70 ± 7           | 92 ± 7 | 0.07 |
| <i>P</i> <sub>genotype</sub> / <i>P</i> <sub>dose</sub> / <i>P</i> <sub>interaction</sub>          |                            | 0.13, 0.54, 0.24 |        |      |
| $\Delta$ <i>P</i> <sub>genotype</sub> / <i>P</i> <sub>dose</sub> / <i>P</i> <sub>interaction</sub> |                            | 0.09, 0.56, 0.10 |        |      |

---

Values are mean ± SEM. HR, heart rate; CO, cardiac output; MAP, mean arterial pressure; SVR, systemic vascular resistance with units = MAP/CO; SV, stroke volume. Analyses were performed using raw values with measures obtained at baseline and each terbutaline dose and also using change from baseline at each terbutaline dose ( $\Delta$ ). *P*<sub>genotype</sub> indicates main effect of genotype, *P*<sub>dose</sub> indicates main effect of terbutaline dose, *P*<sub>interaction</sub> indicates haplotype-by-dose interaction. *P*<sub>ANOVA</sub> indicates comparisons across groups at the given dose of terbutaline.

**Online Supplemental Table 3. Forearm Haemodynamics at Baseline, After Trimethaphan, and Immediately Before and During Terbutaline Infusions**

| Condition                                               |                            | Haplotype Group           |                          |                            | $P_{ANOVA}$ |
|---------------------------------------------------------|----------------------------|---------------------------|--------------------------|----------------------------|-------------|
|                                                         |                            | Arg16 + Gln27<br>(n = 13) | Gly16 + Gln27<br>(n = 6) | Gly16 + Glu 27<br>(n = 21) |             |
| <b>Forearm<br/>Blood Flow<br/>(ml/dl/min)</b>           | Baseline                   | 1.5 ± 0.1                 | 1.5 ± 0.3                | 1.7 ± 0.1                  | ns          |
|                                                         | Trimeth.*                  | 2.8 ± 0.3                 | 3.2 ± 0.7                | 2.8 ± 0.3                  | ns          |
|                                                         | BL <sub>Trimeth + PE</sub> | 5.1 ± 0.9                 | 5.5 ± 2.2                | 4.3 ± 0.6                  | ns          |
|                                                         | Terb 33                    | 7.0 ± 1.0                 | 7.6 ± 2.5                | 6.2 ± 0.6                  | ns          |
|                                                         | Terb 67                    | 10.2 ± 0.9                | 11.8 ± 2.3               | 9.4 ± 0.7                  | ns          |
| $P_{genotype} / P_{dose} / P_{interaction}$             |                            | 0.69, < 0.01, 0.63        |                          |                            |             |
| $\Delta P_{genotype} / P_{dose} / P_{interaction}$      |                            | 0.97, < 0.01, 0.45        |                          |                            |             |
| <b>Forearm<br/>Vascular<br/>Conductance<br/>(units)</b> | Baseline                   | 1.7 ± 0.2                 | 1.7 ± 0.4                | 1.9 ± 0.1                  | ns          |
|                                                         | Trimeth.*                  | 3.7 ± 0.5                 | 4.2 ± 1.1                | 3.7 ± 0.3                  | ns          |
|                                                         | BL <sub>Trimeth + PE</sub> | 5.2 ± 0.8                 | 5.3 ± 2.0                | 4.4 ± 0.5                  | ns          |
|                                                         | Terb 33                    | 8.1 ± 1.1                 | 8.1 ± 2.2                | 7.3 ± 0.7                  | ns          |
|                                                         | Terb 67                    | 15.1 ± 1.6                | 16.0 ± 2.2               | 14.3 ± 1.1                 | ns          |
| $P_{genotype} / P_{dose} / P_{interaction}$             |                            | 0.84, < 0.01, 0.92        |                          |                            |             |
| $\Delta P_{genotype} / P_{dose} / P_{interaction}$      |                            | 0.92, < 0.01, 0.86        |                          |                            |             |
| <b>Forearm<br/>Vascular<br/>Resistance<br/>(units)</b>  | Baseline                   | 68.8 ± 8.1                | 70.4 ± 13.2              | 58.9 ± 5.3                 | ns          |
|                                                         | Trimeth.*                  | 32.9 ± 4.3                | 36.1 ± 10.4              | 31.9 ± 3.1                 | ns          |
|                                                         | BL <sub>Trimeth + PE</sub> | 25.3 ± 3.4                | 36.0 ± 11.6              | 27.6 ± 2.6                 | ns          |
|                                                         | Terb 33                    | 15.7 ± 2.1                | 16.8 ± 4.0               | 15.7 ± 1.5                 | ns          |

|                                                                         |           |                    |           |    |
|-------------------------------------------------------------------------|-----------|--------------------|-----------|----|
| Terb 67                                                                 | 7.7 ± 0.9 | 6.9 ± 1.0          | 8.0 ± 0.7 | ns |
| $P_{\text{genotype}} / P_{\text{dose}} / P_{\text{interaction}}$        |           | 0.26, < 0.01, 0.72 |           |    |
| $\Delta P_{\text{genotype}} / P_{\text{dose}} / P_{\text{interaction}}$ |           | 0.75, < 0.01, 0.78 |           |    |

---

Values are mean ± SEM. FBF, forearm blood flow; FVC, forearm vascular conductance with units = FBF/MAP x 100; FVR, forearm vascular resistance with units = MAP/FBF. Trimeth.\* indicates a significant effect of trimethaphan on all values for all groups (P < 0.01). Analyses were performed using raw values with measures obtained at baseline and each terbutaline dose and also using change from baseline at each terbutaline dose ( $\Delta$ ).  $P_{\text{genotype}}$  indicates main effect of genotype,  $P_{\text{dose}}$  indicates main effect of terbutaline dose,  $P_{\text{interaction}}$  indicates haplotype-by-dose interaction.  $P_{\text{ANOVA}}$  indicates comparisons across groups at the given dose of terbutaline.
